# Supplementary material
Source: PubMed Central journal article supplement (PMC4734639)
Supplement: NIHMS754507-supplement-Supporting_Information.pdf [file NIHMS754507-supplement-Supporting_Information.pdf]

Supporting Information

# Nanoparticle-Mediated Intracellular Delivery Enables Cryopreservation of Human Adipose- Derived Stem Cells Using Trehalose as the Sole Cryoprotectant

*Wei Rao<sup>1,2</sup>, Haishui Huang<sup>1,2,3</sup>, Hai Wang<sup>1,2,4</sup>, Shuting Zhao<sup>1,2</sup>, Jenna Dumbleton<sup>1,2</sup>, Gang Zhao<sup>5</sup>,  
and Xiaoming He<sup>1,2,4\*</sup>*

<sup>1</sup>Department of Biomedical Engineering

The Ohio State University, Columbus, OH 43210, US

<sup>2</sup>Davis Heart and Lung Research Institute

The Ohio State University, Columbus, OH 43210, USA

<sup>3</sup>Department of Mechanical Engineering

The Ohio State University, Columbus, OH 43210, US

<sup>4</sup>Comprehensive Cancer Center

The Ohio State University, Columbus, OH 43210, USA

<sup>5</sup>Centre for Biomedical Engineering, Department of Electronic Science and Technology,

University of Science and Technology of China, Hefei, Anhui 230027, China

**Table S1.** Encapsulation efficiency (EE) and loading content (LC) of propidium iodide (PI) with and without genipin crosslinking using the procedure given in Scheme 1

| <b>Feeding ratio<br/>PI : NPs</b> | <b>Genipin<br/>crosslinking</b> | <b>EE, %</b> | <b>LC, %</b> |
|-----------------------------------|---------------------------------|--------------|--------------|
| 1 : 10                            | No                              | 3.7 ± 0.9    | 0.4 ± 0.1    |
| 1 : 10                            | Yes                             | 36.4 ± 5.8   | 4.1 ± 0.2    |

NPs: Pluronic F127-chitosan nanoparticles

**Table S2.** Encapsulation efficiency (EE) and loading content (LC) at different feeding ratios of free trehalose (fTre) to Pluronic F127-chitosan NPs in weight and the diameter of the resultant GNCs-encapsulated trehalose (nTre) determined by dynamic light scattering (DLS) at different temperature and pH values. Also shown are the data of size for empty GNPs.

| Feeding ratio<br>fTre :<br>GNPs | EE, %      | LC, %      | Diameter of GNPs/nTre, nm |            |            |            |
|---------------------------------|------------|------------|---------------------------|------------|------------|------------|
|                                 |            |            | pH 5                      |            | pH 7       |            |
|                                 |            |            | 22 °C                     | 37 °C      | 22 °C      | 37 °C      |
| 0 :GNPs                         | N/A        | N/A        | 82.2 ± 4.6                | 37.3 ± 2.2 | 28.0 ± 3.5 | 24.8 ± 0.4 |
| 1 : 50                          | 63.5 ± 4.8 | 1.4 ± 0.1  | 38.1 ± 8.1                | 24.9 ± 2.1 | 25.8 ± 8.3 | 19.9 ± 3.3 |
| 1 : 20                          | 59.1 ± 3.1 | 3.5 ± 0.2  | 57.0 ± 15.0               | 30.6 ± 3.6 | 24.0 ± 7.1 | 22.1 ± 5.6 |
| 1 : 10                          | 40.6 ± 5.8 | 4.6 ± 0.4  | 91.5 ± 18.2               | 33.5 ± 1.5 | 26.8 ± 6.2 | 20.1 ± 2.4 |
| 1 : 1                           | 4.9 ± 0.6  | 5.6 ± 0.6  | 93.4 ± 18.3               | 35.2 ± 3.1 | 28.5 ± 5.1 | 21.8 ± 2.9 |
| 10 : 1                          | 1.3 ± 0.1  | 14.4 ± 1.5 | 105.4 ± 14.5              | 47.0 ± 7.2 | 36.2 ± 2.6 | 28.7 ± 4.1 |
| 20 : 1                          | 1.2 ± 0.1  | 26.6 ± 0.8 | 137.5 ± 16.2              | 49.5 ± 5.6 | 42.3 ± 6.1 | 29.5 ± 6.4 |

All data are presented as mean ± standard deviation and N/A represents “ not applicable”.

**Table S3.** Genes and the corresponding primers used for real time RT-PCR studies

| <b>Gene</b>  |         | <b>Primer</b>                              |
|--------------|---------|--------------------------------------------|
| <b>Sox2</b>  | Forward | 5'- CCC ACC TAC AGC ATG TCC TAC TC -3'     |
|              | Reverse | 5'- TGG AGT GGG AGG AAG AGG TAA C -3'      |
| <b>Klf4</b>  | Forward | 5'- GAA ATT CGC CCG CTC CGA TGA -3'        |
|              | Reverse | 5'- CTG TGT GTT TGC GGT AGT GCC -3'        |
| <b>Nanog</b> | Forward | 5'- CCT CCT CCA TGG ATC TGC TTA TTC A -3'  |
|              | Reverse | 5'- CAG GTC TTC ACC TGT TTG TAG CTG AG -3' |
| <b>Oct4</b>  | Forward | 5'- GAA ATT CGC CCG CTC CGA TGA -3'        |
|              | Reverse | 5'- CAT AGT CGC TGC TTG ATC GCT TG -3'     |
| <b>GAPDH</b> | Forward | 5'- GAG TCA ACG GAT TTG GTC GTA -3',       |
|              | Reverse | 5'- ATG GGT GGA ATC ATA TTG GAA -3'        |
